# Supplementary material
Source: Springer Nature journal article supplement (https://www.springermedizin.de/resource/supplementary/12877_2010_310_MOESM1_ESM.pdf/9439358)
Supplement: MOESM1 [file 9439358]

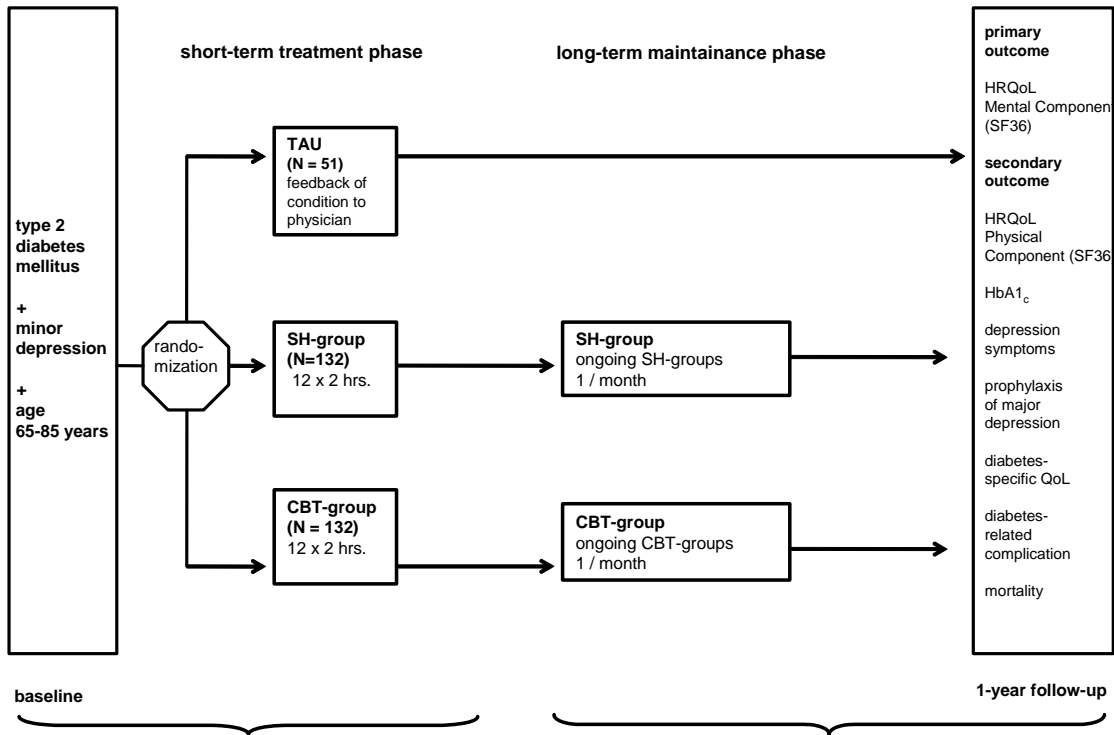

**short-term phase: 12 weeks**  
cognitive behavioural therapy (CBT) vs. treatment as usual (TAU) vs. guided self-help intervention (SH)

**long-term phase: + 1 year (in first funding phase)**  
(Perspective: yearly follow-up's, primary outcome = mortality)
